# Supplementary material
Source: PubMed Central journal article supplement (PMC6878135)
Supplement: NIHMS1053962-supplement-1.pdf [file NIHMS1053962-supplement-1.pdf]

**Table A-1. Multiple logistic regression for association between platform-specific cannabis social media engagement and past 28-day cannabis use**

| Characteristic                      | Any engagement |                   |              | Facebook |             |       | Twitter        |             |       | Instagram |              |       |
|-------------------------------------|----------------|-------------------|--------------|----------|-------------|-------|----------------|-------------|-------|-----------|--------------|-------|
|                                     | aOR            | 95% CI            | P-Val        | aOR      | 95% CI      | P-Val | aOR            | 95% CI      | P-Val | aOR       | 95% CI       | P-Val |
| <b>Engagement<sup>a</sup></b>       |                |                   |              |          |             |       |                |             |       |           |              |       |
| No                                  | (ref)          |                   |              | (ref)    |             |       | (ref)          |             |       | (ref)     |              |       |
| Yes                                 | <b>3.38</b>    | <b>1.41, 8.13</b> | <b>0.007</b> | 3.60     | 1.15, 11.31 | 0.03  | 3.47           | 0.61, 19.66 | 0.16  | 1.14      | 0.33, 3.92   | 0.83  |
| <b>Age</b>                          |                |                   |              |          |             |       |                |             |       |           |              |       |
| 15 years                            | (ref)          |                   |              | (ref)    |             |       | (ref)          |             |       | (ref)     |              |       |
| 16 years                            | 1.61           | 0.64, 4.02        | 0.31         | 1.70     | 0.69, 4.20  | 0.25  | 1.62           | 0.65, 4.01  | 0.30  | 1.49      | 0.60, 3.74   | 0.39  |
| 17 years                            | 1.93           | 0.82, 4.56        | 0.13         | 1.84     | 0.79, 4.30  | 0.16  | 1.97           | 0.84, 4.60  | 0.12  | 1.93      | 0.82, 4.51   | 0.13  |
| 18 years                            | 2.36           | 1.05, 5.32        | 0.04         | 2.25     | 1.01, 5.03  | 0.05  | 2.38           | 1.07, 5.30  | 0.03  | 2.35      | 1.05, 5.24   | 0.04  |
| 19 years                            | 2.15           | 0.91, 5.07        | 0.08         | 2.02     | 0.86, 4.74  | 0.11  | 2.07           | 0.89, 4.85  | 0.10  | 2.22      | 0.96, 5.17   | 0.06  |
| <b>Gender</b>                       |                |                   |              |          |             |       |                |             |       |           |              |       |
| Male                                | 0.91           | 0.55, 1.49        | 0.70         | 0.89     | 0.54, 1.45  | 0.64  | 0.92           | 0.56, 1.50  | 0.73  | 0.92      | 0.56, 1.51   | 0.75  |
| Female                              | (ref)          |                   |              | (ref)    |             |       | (ref)          |             |       | (ref)     |              |       |
| Other <sup>b</sup>                  | 0.95           | 0.30, 3.00        | 0.93         | 0.93     | 0.30, 2.92  | 0.91  | 1.04           | 0.34, 3.13  | 0.95  | 1.01      | 0.33, 3.03   | 0.99  |
| <b>Race/Ethnicity</b>               |                |                   |              |          |             |       |                |             |       |           |              |       |
| White                               | (ref)          |                   |              | (ref)    |             |       | (ref)          |             |       | (ref)     |              |       |
| African American                    | 0.54           | 0.21, 1.38        | 0.20         | 0.57     | 0.23, 1.45  | 0.24  | 0.55           | 0.21, 1.42  | 0.21  | 0.62      | 0.25, 1.54   | 0.30  |
| Hispanic/Latino                     | 0.71           | 0.42, 1.20        | 0.20         | 0.78     | 0.47, 1.30  | 0.35  | 0.75           | 0.45, 1.23  | 0.25  | 0.68      | 0.41, 1.13   | 0.13  |
| Other                               | 0.74           | 0.40, 1.37        | 0.34         | 0.78     | 0.42, 1.44  | 0.43  | 0.77           | 0.42, 1.42  | 0.40  | 0.77      | 0.42, 1.42   | 0.40  |
| Hispanic*Engagement                 | 2.82           | 0.61, 13.02       | 0.18         | 2.25     | 0.30, 17.08 | 0.43  | — <sup>c</sup> |             |       | 23.92     | 2.09, 274.32 | 0.01  |
| <b>Parent education</b>             |                |                   |              |          |             |       |                |             |       |           |              |       |
| High school/some college            | (ref)          |                   |              | (ref)    |             |       | (ref)          |             |       | (ref)     |              |       |
| Bachelor's degree or higher         | 0.51           | 0.29, 0.90        | 0.02         | 0.50     | 0.29, 0.88  | 0.02  | 0.50           | 0.28, 0.87  | 0.02  | 0.52      | 0.29, 0.91   | 0.02  |
| <b>Timing of state legalization</b> |                |                   |              |          |             |       |                |             |       |           |              |       |
| Early                               | (ref)          |                   |              | (ref)    |             |       | (ref)          |             |       | (ref)     |              |       |
| Late                                | 1.12           | 0.70, 1.80        | 0.63         | 1.11     | 0.70, 1.78  | 0.65  | 1.14           | 0.71, 1.81  | 0.59  | 1.11      | 0.70, 1.78   | 0.65  |

Bold indicates statistically significant after Bonferroni correction (p<0.008).

aOR adjusted odds ratio; CI confidence interval; p-val p-value

<sup>a</sup>Engagement with cannabis social media business pages defined as liking, following, and/or commenting on a cannabis business page on Facebook, Twitter, and/or Instagram.

<sup>b</sup>Other gender includes non-binary gender, male-to-female transgender, female-to-male transgender, and other.

<sup>c</sup>Variable omitted from model because it perfectly predicted failure.

**Table A-2. Multiple logistic regression for association between platform-specific cannabis social media engagement and past 28-day cannabis use**

| Characteristic                | Favorite cannabis brand |                    |                  | Own cannabis branded merchandise |                    |                  |
|-------------------------------|-------------------------|--------------------|------------------|----------------------------------|--------------------|------------------|
|                               | aOR                     | 95% CI             | P-Val            | aOR                              | 95% CI             | P-Val            |
| Brand engagement <sup>a</sup> |                         |                    |                  |                                  |                    |                  |
| No                            | (ref)                   |                    |                  | (ref)                            |                    |                  |
| Yes                           | <b>8.06</b>             | <b>4.31, 15.06</b> | <b>&lt;0.001</b> | <b>12.04</b>                     | <b>6.53, 22.20</b> | <b>&lt;0.001</b> |
| Age                           |                         |                    |                  |                                  |                    |                  |
| 15 years                      | (ref)                   |                    |                  | (ref)                            |                    |                  |
| 16 years                      | 1.49                    | 0.57, 3.88         | 0.41             | 1.83                             | 0.69, 4.91         | 0.23             |
| 17 years                      | 1.72                    | 0.70, 4.22         | 0.24             | 1.73                             | 0.69, 4.36         | 0.25             |
| 18 years                      | 1.58                    | 0.67, 3.71         | 0.30             | 1.96                             | 0.82, 4.68         | 0.13             |
| 19 years                      | 1.49                    | 0.60, 3.68         | 0.39             | 1.71                             | 0.68, 4.30         | 0.26             |
| Gender                        |                         |                    |                  |                                  |                    |                  |
| Male                          | 0.85                    | 0.50, 1.44         | 0.55             | 0.76                             | 0.45, 1.30         | 0.31             |
| Female                        | (ref)                   |                    |                  | (ref)                            |                    |                  |
| Other <sup>b</sup>            | 1.02                    | 0.30, 3.43         | 0.98             | 0.83                             | 0.24, 2.91         | 0.78             |
| Race/Ethnicity                |                         |                    |                  |                                  |                    |                  |
| White                         | (ref)                   |                    |                  | (ref)                            |                    |                  |
| African American              | 0.41                    | 0.15, 1.14         | 0.09             | 0.46                             | 0.16, 1.35         | 0.16             |
| Hispanic/Latino               | 0.80                    | 0.42, 1.52         | 0.50             | 1.39                             | 0.66, 2.74         | 0.41             |
| Other                         | 0.80                    | 0.41, 1.56         | 0.52             | 0.73                             | 0.36, 1.48         | 0.39             |
| Hispanic*Engagement           | 0.98                    | 0.35, 2.70         | 0.97             | <b>0.26</b>                      | <b>0.10, 0.66</b>  | <b>0.005</b>     |
| Parent education              |                         |                    |                  |                                  |                    |                  |
| High school/some college      | (ref)                   |                    |                  | (ref)                            |                    |                  |
| Bachelor's degree or higher   | 0.58                    | 0.32, 1.07         | 0.08             | 0.46                             | 0.25, 0.87         | 0.02             |
| Timing of state legalization  |                         |                    |                  |                                  |                    |                  |
| Early                         | (ref)                   |                    |                  | (ref)                            |                    |                  |
| Late                          | 0.94                    | 0.57, 1.55         | 0.81             | 1.23                             | 0.73, 2.05         | 0.44             |

Bold indicates statistically significant after Bonferroni correction (p<0.008).

aOR adjusted odds ratio; CI confidence interval; p-val p-value

<sup>a</sup>Other gender includes non-binary gender, male-to-female transgender, female-to-male transgender, and other.

<sup>b</sup>Variable omitted from model because it perfectly predicted failure.
